# Supplementary material for: Characterising Foot-and-Mouth Disease Virus in Clinical Samples Using Nanopore Sequencing
Source: Frontiers journal article supplement (doi:10.3389/fvets.2021.656256), 2021-05-17
Supplement: Data_Sheet_1.PDF [file Data_Sheet_1.PDF]

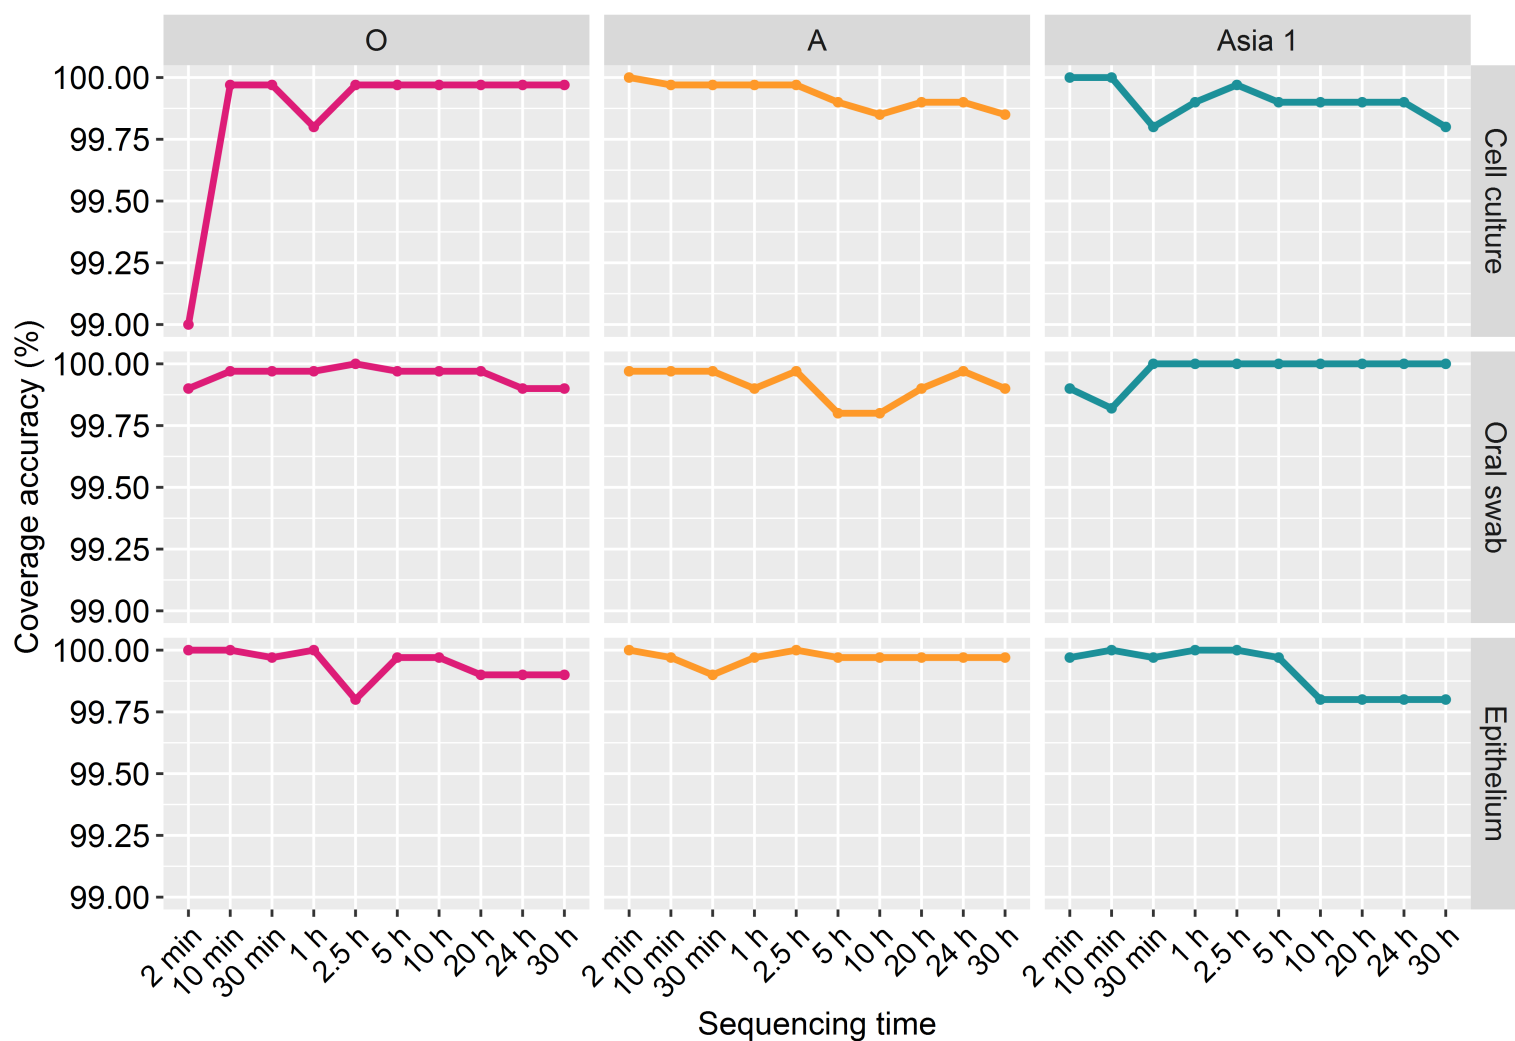

**Figure S.1:** Consensus accuracy (%) achieved for each sample throughout the duration of the MinION sequencing runs when compared to the respective reference sequence generated on the Illumina MiSeq.
